# Supplementary material for: The abundance of large, piscivorous Ferox Trout (Salmo trutta) in Loch Rannoch, Scotland
Source: PubMed Central journal article supplement (PMC5101599; doi:10.7717/peerj.2646), 2016-11-01
Supplement: peerj-04-2646-s004.pdf [file peerj-04-2646-s004.pdf]

To replicate the analyses

1. Install R Version ( $\geq 3.2.2$ ) from <https://cran.r-project.org>.
2. Install JAGS ( $\geq 3.4.0$ ) from <http://sourceforge.net/projects/mcmc-jags/files/> to the default location.
3. If using Windows install Rtools ( $\geq 3.2.2$ ) from <https://cran.r-project.org/bin/windows/Rtools/> choosing the default options.
4. Cut and paste the following code into the R console to quickly generate non-convergent results.

```
install.packages("devtools")  
library(devtools)
```

```
install_github("poissonconsulting/tulip@v0.0.13")  
install_github("poissonconsulting/datalist@v0.5.1")  
install_github("poissonconsulting/juggler@v0.1.5")  
install_github("poissonconsulting/jaggernaut@v2.3.3")
```

```
install_github("poissonconsulting/ranmrdata")  
install_github("poissonconsulting/ranmr")
```

```
library(ranmr)  
replicate_results()
```

5. Open the `results` folder in the working directory to view the plots which are saved as png files.
6. For more information type `?replicate_results`.
